# Supplementary material for: A risk score based on real-world data to predict early death in acute promyelocytic leukemia
Source: PubMed Central journal article supplement — Haematologica. 2022 Jan 27;107(7):1528–37. doi: 10.3324/haematol.2021.280093 (PMC9244824; doi:10.3324/haematol.2021.280093), 2022-01-27
Supplement: 2021_280093_OSTERROOS_SUPPL.pdf [file 2021_280093_OSTERROOS_SUPPL.pdf]

# A risk score based on real-world data to predict early death in acute promyelocytic leukemia

Albin Österroos,<sup>1</sup> Tânia Maia,<sup>2</sup> Anna Eriksson,<sup>1</sup> Martin Jädersten,<sup>3</sup> Vladimir Lazarevic,<sup>4,5</sup> Lovisa Wennström,<sup>6</sup> Petar Antunovic,<sup>7</sup> Jörg Cammenga,<sup>7</sup> Stefan Deneberg,<sup>3</sup> Fryderyk Lorenz,<sup>8</sup> Lars Möllgård,<sup>6</sup> Bertil Uggla,<sup>9</sup> Emma Ölander,<sup>10</sup> Eliana Aguiar,<sup>2</sup> Fernanda Trigo,<sup>2</sup> Martin Höglund,<sup>1</sup> Gunnar Juliusson<sup>4,5</sup> and Sören Lehmann<sup>1,3</sup>

<sup>1</sup>Department of Medical Sciences, Uppsala University, Uppsala, Sweden; <sup>2</sup>Department of Clinical Hematology, University Hospital Center of São João, Porto, Portugal; <sup>3</sup>Department of Hematology, Karolinska University Hospital, Stockholm, Sweden; <sup>4</sup>Department of Hematology, Skåne University Hospital, Lund, Sweden; <sup>5</sup>Stem Cell Center, Department of Hematology, Department of Laboratory Medicine, Lund University, Lund, Sweden; <sup>6</sup>Department of Hematology, Sahlgrenska University Hospital, Gothenburg, Sweden; <sup>7</sup>Department of Hematology, Linköping University Hospital, Linköping, Sweden; <sup>8</sup>Department of Hematology, Norrland University Hospital, Umeå, Sweden; <sup>9</sup>Department of Medicine, Division of Hematology, Orebro University Hospital, Orebro, Sweden and <sup>10</sup>Department of Hematology, Sundsvall Hospital, Sundsvall, Sweden

## Correspondence:

Sören Lehmann  
[soren.lehmann@medsci.uu.se](mailto:soren.lehmann@medsci.uu.se)

**Received:** September 29, 2021.

**Accepted:** December 21, 2021.

**Prepublished:** January 27, 2022.

<https://doi.org/10.3324/haematol.2021.280093>

©2022 Ferrata Storti Foundation

Haematologica material is published under a CC

BY-NC license 

## **Supplementary**

### **A real-world based score to predict early death in acute promyelocytic leukemia**

Albin Österroos, Tânia Maia, Anna Eriksson, Martin Jädersten, Vladimir Lazarevic, Lovisa Wennström, Petar Antunovic, Jörg Cammenga, Stefan Deneberg, Fryderyk Lorenz, Lars Möllgård, Bertil Ugglå, Emma Ölander, Eliana Aguiar, Fernanda Trigo, Martin Höglund, Gunnar Juliusson, Sören Lehmann

## **Supplementary Methods and References**

## **Supplementary Methods**

### **R packages and details of APL risk score development**

All statistical analyses were performed using the computing environment R version 4.0.2 [1]. The packages compareGroups version 4.4.6 [2] and MASS version 7.3.53 [3] were applied for descriptive statistics, cohort comparisons and logistic regression analyses (Table 1-2, Supplementary Table 1-2). We applied backward stepwise selection minimizing the Akaike information criterion for removal of predictors for the final multivariable logistic regression model in Supplementary Table 2.

The package mice (version 3.12.0) [4] was used to impute missing data in the training cohort by predictive mean matching on 5 imputations with 50 iterations.

Multivariable penalized logistic regression analysis was performed by applying the package glmnet (version 4.1.1) [5] on the original dataset to obtain ridge regression coefficients. Ridge regression applies cross validation in order to maximize the predictive ability of a model and performs well with the availability of prespecified predictors [6].

The discriminative capability of the score was assessed based on the area under the receiver operating characteristic (AUROC) curve using pROC (version 1.16.2) [7].

No formal sample size calculations were performed since all available data was used to maximize the generalizability of the results. All statistical analyses were two-sided with  $P < 0.05$  considered statistically significant. The risk score was developed in line with the Transparent Reporting of a multivariable prediction model for Individual Prognosis or Diagnosis (TRIPOD) [8] statement with a completed checklist found on page 16 in this Supplementary.

Figures 1-2 and Supplementary Figure 4 were created using the package ggplot2 (version 3.3.2) [9]. Kaplan-Meier curves and log-rank P-values in Supplementary Figure 3 were obtained by the package survival (version 3.2.13) [10] and plotted by the package survminer (version 0.4.9) [11] for the different cut-off values for white blood cells at diagnosis with censoring of non-ED patients at 30 days. The package ggalluvial (version 0.12.3) [12] was used for Supplementary Figure 5.

The online calculator published at [apl-early-death.shinyapps.io/risk-score](http://apl-early-death.shinyapps.io/risk-score) was developed with the packages shiny (version 1.7.1) [13], shinythemes (version 1.2.0) [14] and shinydashboard (version 0.7.2) [15].

## **Supplementary references**

1. R Core Team (2017). R: A language and environment for statistical computing. R Foundation for Statistical Computing, Vienna, Austria. <https://www.R-project.org/>.
2. Isaac Subirana, Hector Sanz, Joan Vila (2014). Building Bivariate Tables: The compareGroups Package for R. *Journal of Statistical Software*, 57(12), 1-16. <https://www.jstatsoft.org/v57/i12/>.
3. Venables, W. N. & Ripley, B. D. (2002) *Modern Applied Statistics with S*. Fourth Edition. Springer, New York. ISBN 0-387-95457-0.
4. Stef van Buuren, Karin Groothuis-Oudshoorn (2011). mice: Multivariate Imputation by Chained Equations in R. *Journal of Statistical Software*, 45(3), 1-67. <https://www.jstatsoft.org/v45/i03/>.
5. Jerome Friedman, Trevor Hastie, Robert Tibshirani (2010). Regularization Paths for Generalized Linear Models via Coordinate Descent. *Journal of Statistical Software*, 33(1), 1-22. <https://www.jstatsoft.org/v33/i01/>.
6. Pavlou M, Ambler G, Seaman SR, et al. How to develop a more accurate risk prediction model when there are few events. *BMJ* 2015;h3868.
7. Xavier Robin, Natacha Turck, Alexandre Hainard, Natalia Tiberti, Frédérique Lisacek, Jean-Charles Sanchez and Markus Müller (2011). pROC: an open-source package for R and S+ to analyze and compare ROC curves. *BMC Bioinformatics*, 12, p. 77. DOI: 10.1186/1471-2105-12-77. <http://www.biomedcentral.com/1471-2105/12/77/>.
8. Moons KGM, Altman DG, Reitsma JB, et al. Transparent Reporting of a multivariable prediction model for Individual Prognosis Or Diagnosis (TRIPOD): Explanation and Elaboration. *Ann Intern Med* 2015;162(1):W.
9. Wickham H (2016). *ggplot2: Elegant Graphics for Data Analysis*. Springer-Verlag New York. ISBN 978-3-319-24277-4, <https://ggplot2.tidyverse.org>.
10. Therneau T (2021). A Package for Survival Analysis in R. R package version 3.2-13. <https://CRAN.R-project.org/package=survival>.
11. Alboukadel Kassambara, Marcin Kosinski and Przemyslaw Biecek (2021). survminer: Drawing Survival Curves using 'ggplot2'. R package version 0.4.9. <https://CRAN.R-project.org/package=survminer>.
12. Jason Cory Brunson and Quentin D. Read (2020). ggalluvial: Alluvial Plots in 'ggplot2'. R package version 0.12.3. <http://corybrunson.github.io/ggalluvial/>.
13. Winston Chang, Joe Cheng, JJ Allaire, Carson Sievert, Barret Schloerke, Yihui Xie, Jeff Allen, Jonathan McPherson, Alan Dipert and Barbara Borges (2021). shiny: Web Application Framework for R. R package version 1.7.1. <https://CRAN.R-project.org/package=shiny>.
14. Winston Chang (2021). shinythemes: Themes for Shiny. R package version 1.2.0. <https://CRAN.R-project.org/package=shinythemes>.
15. Winston Chang and Barbara Borges Ribeiro (2021). shinydashboard: Create Dashboards with 'Shiny'. R package version 0.7.2. <https://CRAN.R-project.org/package=shinydashboard>.

## **Supplementary Tables**

**Supplementary Table 1. Demographic comparison of patients with complete and non-complete data in training cohort.**

|                                                       | <b>Complete data (n = 275)</b> | <b>Non-complete data (n = 26)</b> | <b>P-value</b> |
|-------------------------------------------------------|--------------------------------|-----------------------------------|----------------|
| <b>Age (median, range)</b>                            | 55 (17 - 89)                   | 46 (21 - 82)                      | 0.34           |
| <b>Women (n, %)</b>                                   | 134 (48.7)                     | 17 (65.4)                         | 0.16           |
| <b>WHO status (n, %)</b>                              |                                |                                   | 0.20           |
| 0                                                     | 63 (26.4)                      | 7 (43.8)                          |                |
| 1                                                     | 114 (47.7)                     | 5 (31.2)                          |                |
| 2                                                     | 43 (18.0)                      | 2 (12.5)                          |                |
| 3                                                     | 10 (4.2)                       | 0 (0)                             |                |
| 4                                                     | 9 (3.8)                        | 2 (12.5)                          |                |
| <b>Time to early death, days (median, range)</b>      | 6 (0 - 29)                     | 2 (1 - 13)                        | 0.36           |
| <b>Death within 7 d (n, %)</b>                        | 30 (10.9)                      | 5 (19.2)                          | 0.20           |
| <b>Death within 30 d (n, %)</b>                       | 53 (19.3)                      | 6 (23.1)                          | 0.84           |
| <b>Abbreviations:</b> WHO: World Health Organization. |                                |                                   |                |

**Supplementary Table 2. Multivariate logistic regression analyses for ED in the training cohort, n = 301.**

|                                                                             | <b>Odds ratio</b> | <b>95% CI</b> |
|-----------------------------------------------------------------------------|-------------------|---------------|
| <b>Age</b><br>(continuous, increment of 10)                                 | 1.50              | 1.24 - 1.83   |
| <b>White blood cells, x10<sup>9</sup>/L</b><br>(continuous, increment of 5) | 1.10              | 1.05 - 1.16   |
| <b>Thrombocytes, x10<sup>9</sup>/L</b><br>(continuous, increment of 10)     | 0.86              | 0.77 - 0.95   |

**Footnotes:** Hemoglobin was included as additional variable but was removed by backward selection.

**Abbreviations:** ED: Early death, i.e. death within 30 days from diagnosis; CI: Confidence interval.



Supplementary Table 3. Distribution of ED per risk score.

| Score        | Training cohort, n = 301 |           |              |             | Validation cohort, n = 129 |           |              |             |
|--------------|--------------------------|-----------|--------------|-------------|----------------------------|-----------|--------------|-------------|
|              | Total (n)                | Event (n) | No event (n) | % ED30      | Total (n)                  | Event (n) | No event (n) | % ED30      |
| 0            | 36                       | 0         | 36           | 0 %         | 14                         | 2         | 12           | 14 %        |
| 1            | 54                       | 4         | 50           | 7 %         | 26                         | 2         | 24           | 8 %         |
| 2            | 35                       | 2         | 33           | 6 %         | 20                         | 0         | 20           | 0 %         |
| 3            | 68                       | 7         | 61           | 10 %        | 27                         | 5         | 22           | 19 %        |
| 4            | 51                       | 17        | 34           | 33 %        | 17                         | 6         | 11           | 35 %        |
| 5            | 24                       | 10        | 14           | 42 %        | 10                         | 4         | 6            | 40 %        |
| 6            | 24                       | 14        | 10           | 58 %        | 10                         | 4         | 6            | 40 %        |
| 7            | 9                        | 5         | 4            | 56 %        | 5                          | 1         | 4            | 20 %        |
| <b>Total</b> | 301                      | 59        | 242          | <b>20 %</b> | 129                        | 24        | 105          | <b>19 %</b> |

**Abbreviations:** ED: Death within 30 days from diagnosis.

Supplementary Table 4. Reclassification table when comparing the proposed risk score to the Sanz risk score.

|                        |              | ED (n = 83)         |     |         | Reclassified, n (%) |                |                            |
|------------------------|--------------|---------------------|-----|---------|---------------------|----------------|----------------------------|
|                        |              | Proposed risk score |     |         | Increased risk      | Decreased risk | Net correctly reclassified |
|                        |              | LR                  | HR  | Very HR |                     |                |                            |
| Sanz risk              | Low          | 7                   | 7   | 2       |                     |                |                            |
|                        | Intermediate | 3                   | 13  | 9       | 18 (21.7)           | 18 (21.7)      | 0 (0)                      |
|                        | High         | 0                   | 15  | 27      |                     |                |                            |
|                        | Total        | 10                  | 35  | 38      |                     |                |                            |
| <b>No ED (n = 347)</b> |              |                     |     |         |                     |                |                            |
|                        |              | Proposed risk score |     |         |                     |                |                            |
|                        |              | LR                  | HR  | Very HR |                     |                |                            |
| Sanz risk              | Low          | 73                  | 36  | 2       |                     |                |                            |
|                        | Intermediate | 102                 | 50  | 6       | 44 (12.6)           | 144 (41.5)     | 100 (28.8)                 |
|                        | High         | 0                   | 42  | 36      |                     |                |                            |
|                        | Total        | 175                 | 128 | 44      |                     |                |                            |
|                        |              |                     |     |         | 62 (14.4)           | 162 (37.7)     | 100 (23.3)                 |

**Abbreviations:** ED: Early death, i.e. death within 30 days from diagnosis, LR: Low risk, HR: High risk.

## **Supplementary Figures**

### Supplementary Figure 1. Distribution of induction therapies.

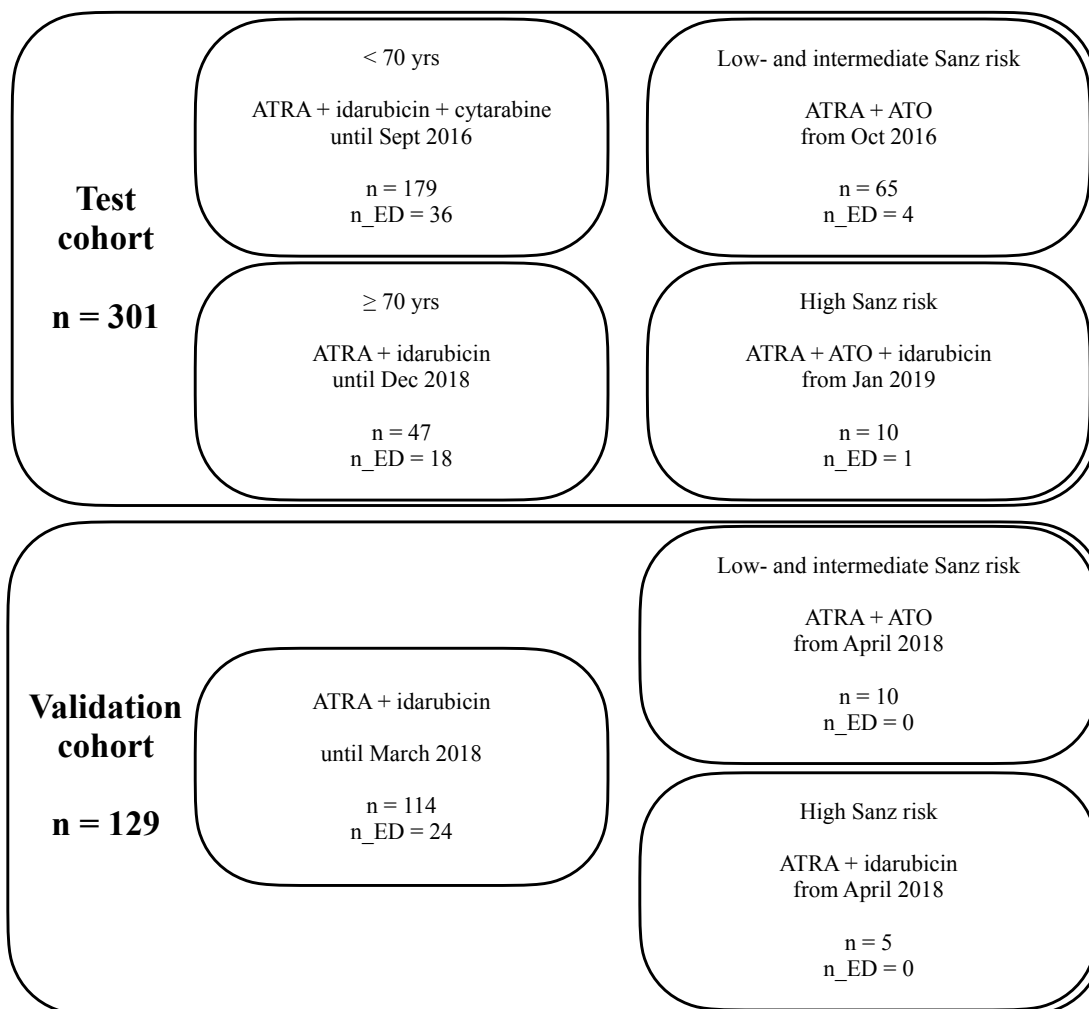

## Supplementary Figure 2. Flow chart of score development.

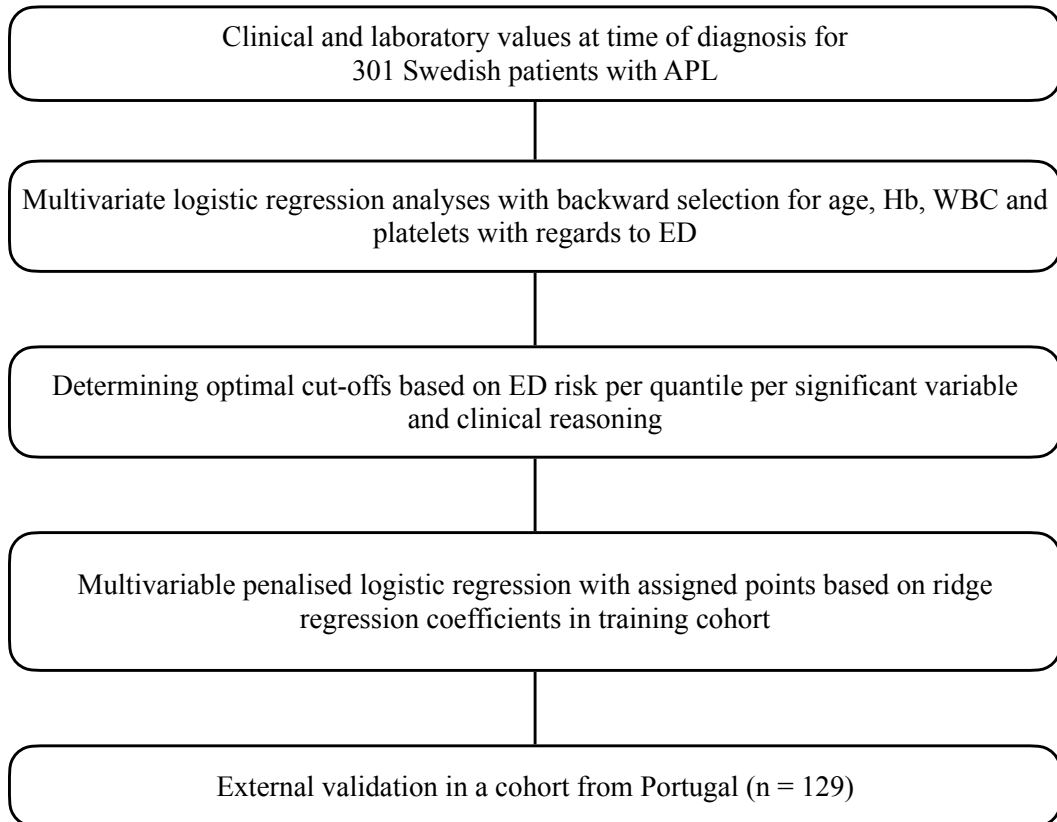

**Supplementary Figure 3. Overall survival related to WBC at diagnosis.**

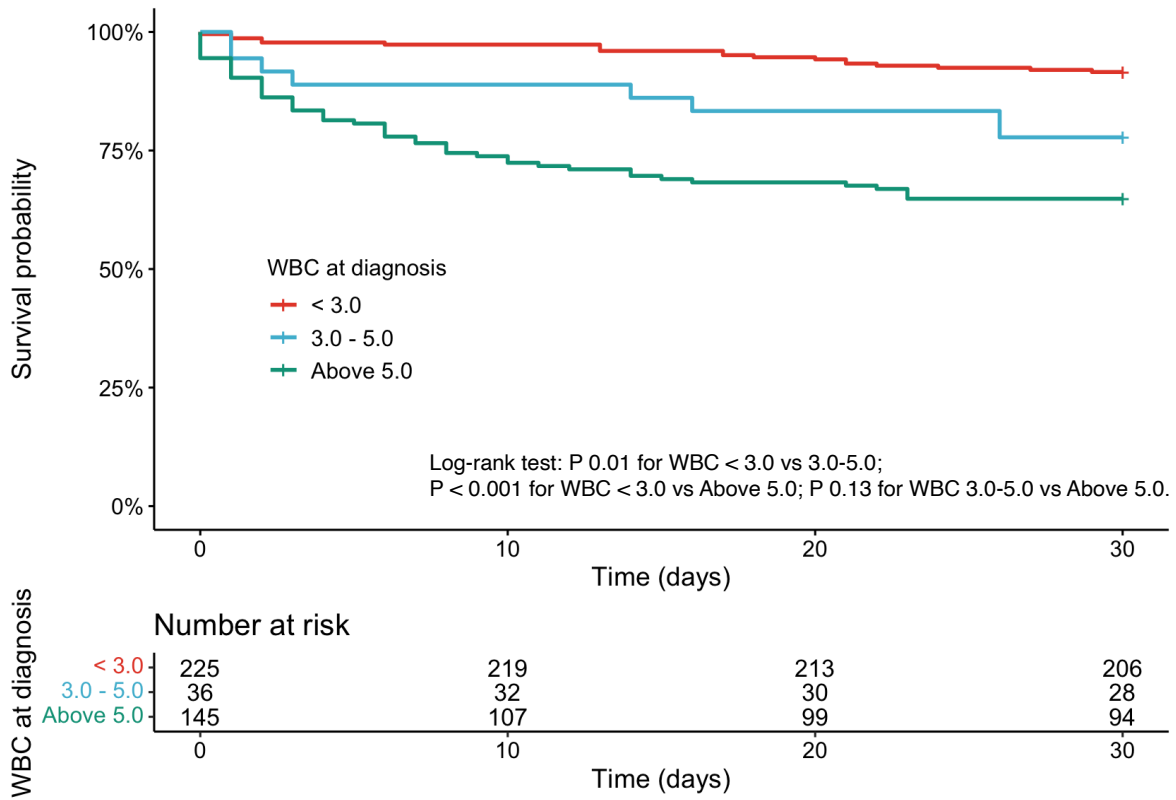

Supplementary Figure 4. Predicted risk of ED per assigned point.

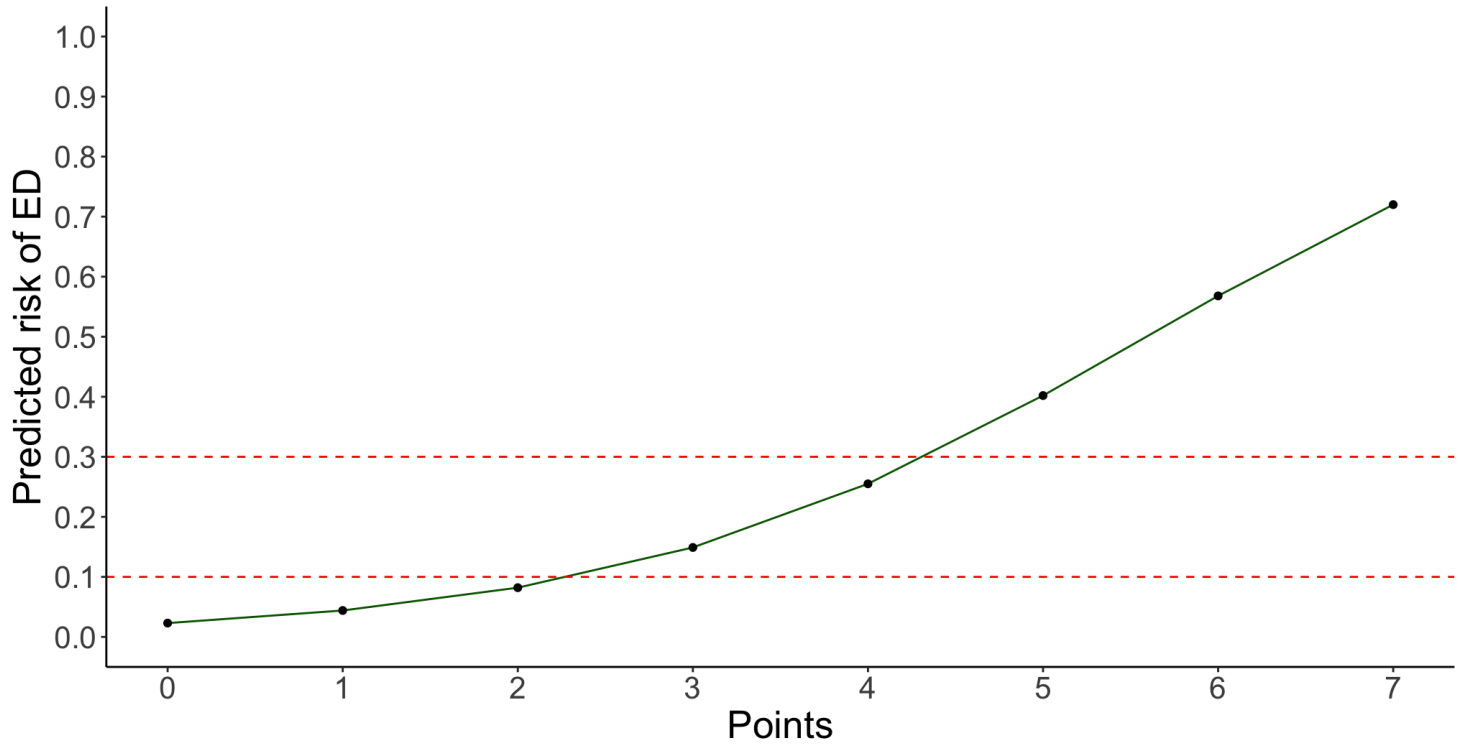

**Supplementary Figure 5. Alluvial diagram for comparison of risk grouping using the proposed risk score to the Sanz risk score.**

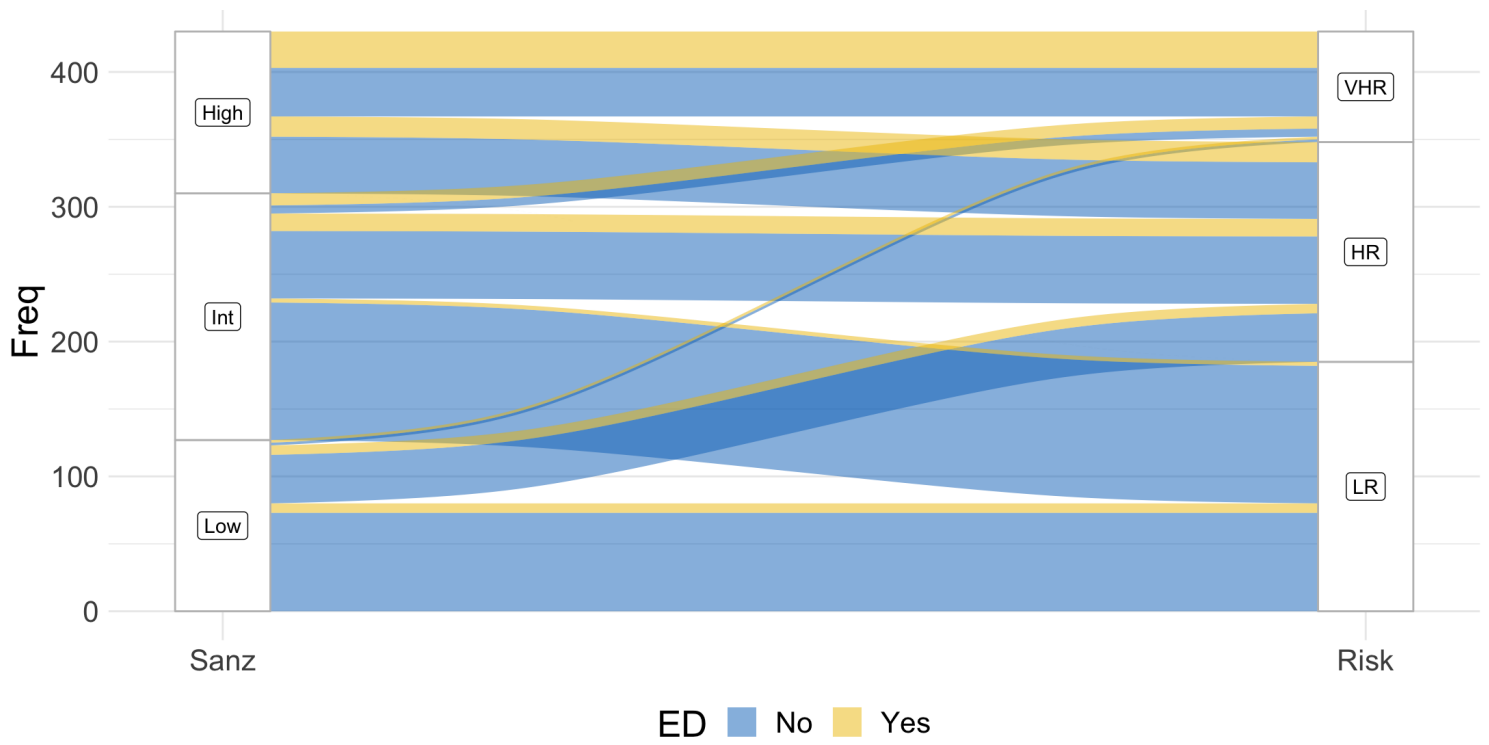



TRIPOD Checklist: Prediction Model Development and Validation

| Section/Topic                | Item | Checklist Item                                                                                                                                                                                            | Page               |
|------------------------------|------|-----------------------------------------------------------------------------------------------------------------------------------------------------------------------------------------------------------|--------------------|
| <b>Title and abstract</b>    |      |                                                                                                                                                                                                           |                    |
| Title                        | 1    | D;V Identify the study as developing and/or validating a multivariable prediction model, the target population, and the outcome to be predicted.                                                          | 1                  |
| Abstract                     | 2    | D;V Provide a summary of objectives, study design, setting, participants, sample size, predictors, outcome, statistical analysis, results, and conclusions.                                               | 2                  |
| <b>Introduction</b>          |      |                                                                                                                                                                                                           |                    |
| Background and objectives    | 3a   | D;V Explain the medical context (including whether diagnostic or prognostic) and rationale for developing or validating the multivariable prediction model, including references to existing models.      | 3-4                |
|                              | 3b   | D;V Specify the objectives, including whether the study describes the development or validation of the model or both.                                                                                     | 4                  |
| <b>Methods</b>               |      |                                                                                                                                                                                                           |                    |
| Source of data               | 4a   | D;V Describe the study design or source of data (e.g., randomized trial, cohort, or registry data), separately for the development and validation data sets, if applicable.                               | 4                  |
|                              | 4b   | D;V Specify the key study dates, including start of accrual; end of accrual; and, if applicable, end of follow-up.                                                                                        | 4                  |
| Participants                 | 5a   | D;V Specify key elements of the study setting (e.g., primary care, secondary care, general population) including number and location of centres.                                                          | 4-5                |
|                              | 5b   | D;V Describe eligibility criteria for participants.                                                                                                                                                       | 4-5                |
|                              | 5c   | D;V Give details of treatments received, if relevant.                                                                                                                                                     | 5                  |
| Outcome                      | 6a   | D;V Clearly define the outcome that is predicted by the prediction model, including how and when assessed.                                                                                                | 5                  |
|                              | 6b   | D;V Report any actions to blind assessment of the outcome to be predicted.                                                                                                                                | NA                 |
| Predictors                   | 7a   | D;V Clearly define all predictors used in developing or validating the multivariable prediction model, including how and when they were measured.                                                         | 5-6                |
|                              | 7b   | D;V Report any actions to blind assessment of predictors for the outcome and other predictors.                                                                                                            | NA                 |
| Sample size                  | 8    | D;V Explain how the study size was arrived at.                                                                                                                                                            | Suppl.             |
| Missing data                 | 9    | D;V Describe how missing data were handled (e.g., complete-case analysis, single imputation, multiple imputation) with details of any imputation method.                                                  | Suppl.             |
| Statistical analysis methods | 10a  | D Describe how predictors were handled in the analyses.                                                                                                                                                   | 5-6<br>Suppl.      |
|                              | 10b  | D Specify type of model, all model-building procedures (including any predictor selection), and method for internal validation.                                                                           | 5-6,<br>Suppl.     |
|                              | 10c  | V For validation, describe how the predictions were calculated.                                                                                                                                           | 5-6,<br>Suppl.     |
|                              | 10d  | D;V Specify all measures used to assess model performance and, if relevant, to compare multiple models.                                                                                                   | Suppl.             |
|                              | 10e  | V Describe any model updating (e.g., recalibration) arising from the validation, if done.                                                                                                                 | NA                 |
| Risk groups                  | 11   | D;V Provide details on how risk groups were created, if done.                                                                                                                                             | 8-9                |
| Development vs. validation   | 12   | V For validation, identify any differences from the development data in setting, eligibility criteria, outcome, and predictors.                                                                           | 6-7                |
| <b>Results</b>               |      |                                                                                                                                                                                                           |                    |
| Participants                 | 13a  | D;V Describe the flow of participants through the study, including the number of participants with and without the outcome and, if applicable, a summary of the follow-up time. A diagram may be helpful. | 6-7                |
|                              | 13b  | D;V Describe the characteristics of the participants (basic demographics, clinical features, available predictors), including the number of participants with missing data for predictors and outcome.    | 6-7                |
|                              | 13c  | V For validation, show a comparison with the development data of the distribution of important variables (demographics, predictors and outcome).                                                          | Table 1            |
| Model development            | 14a  | D Specify the number of participants and outcome events in each analysis.                                                                                                                                 | 6-7                |
|                              | 14b  | D If done, report the unadjusted association between each candidate predictor and outcome.                                                                                                                | Table 2            |
| Model specification          | 15a  | D Present the full prediction model to allow predictions for individuals (i.e., all regression coefficients, and model intercept or baseline survival at a given time point).                             | Table 3            |
|                              | 15b  | D Explain how to use the prediction model.                                                                                                                                                                | Table 3,<br>Fig. 3 |
| Model performance            | 16   | D;V Report performance measures (with CIs) for the prediction model.                                                                                                                                      | 9                  |
| Model-updating               | 17   | V If done, report the results from any model updating (i.e., model specification, model performance).                                                                                                     | NA                 |
| <b>Discussion</b>            |      |                                                                                                                                                                                                           |                    |
| Limitations                  | 18   | D;V Discuss any limitations of the study (such as nonrepresentative sample, few events per predictor, missing data).                                                                                      | 11-14              |
| Interpretation               | 19a  | V For validation, discuss the results with reference to performance in the development data, and any other validation data.                                                                               | 11-14              |
|                              | 19b  | D;V Give an overall interpretation of the results, considering objectives, limitations, results from similar studies, and other relevant evidence.                                                        | 11-14              |
| Implications                 | 20   | D;V Discuss the potential clinical use of the model and implications for future research.                                                                                                                 | 11-14              |
| <b>Other information</b>     |      |                                                                                                                                                                                                           |                    |
| Supplementary information    | 21   | D;V Provide information about the availability of supplementary resources, such as study protocol, Web calculator, and data sets.                                                                         | 14                 |
| Funding                      | 22   | D;V Give the source of funding and the role of the funders for the present study.                                                                                                                         | 14-15              |

\*Items relevant only to the development of a prediction model are denoted by D, items relating solely to a validation of a prediction model are denoted by V, and items relating to both are denoted D;V. We recommend using the TRIPOD Checklist in conjunction with the TRIPOD Explanation and Elaboration document.
